# Supplementary material for: Effective radiative forcing in the aerosol–climate model CAM5.3-MARC-ARG
Source: Copernicus journal article supplement (doi:10.5194/acp-2018-118), 2018-05-02
Supplement: Supplementary file 1 [file acp-2018-118-supplement.pdf]

Introduction

This document contains a supplementary table and supplementary figures for the manuscript titled “*Effective radiative forcing in the aerosol–climate model CAM5.3-MARC-ARG*”. The supplementary figures are grouped thematically: cloud condensation nuclei concentration (Figs. S1 and S2), cloud water path and fraction (Figs. S3–S7), total precipitation rate (Fig. S8), wind speed (Fig. S9), snow cover and rate (Figs. S10 and S11), and black carbon deposition (Figs. S12 and S13).

Supplementary Table

**Table S1: Results from the six timing simulations.** Each of these simulations consists of “20-day model runs with restarts and history turned off” (CESM Software Engineering Group, 2015), repeated five times in order to assess variability. The repetition of each simulation allows the standard error to be calculated via calculation of the corrected sample standard deviation. For consistency, all runs have been submitted on the same day. For each run, 720 processors, spread across 20 nodes on Cheyenne (doi:10.5065/D6RX99HX), have been used. As with the year-2000 and year-1850 simulations (Section 2.3 of the main manuscript), a model resolution of  $1.9^{\circ} \times 2.5^{\circ}$  is used, SSTs and greenhouse gas concentrations are prescribed using year-2000 climatological values, and aerosol and aerosol precursor emissions follow year-2000 emissions. In contrast to the simulations described in the main manuscript, COSP has not been used in these timing simulations. The simulation costs shown represent the total cost of all model components, including non-atmospheric components such as the land scheme.

| Aerosol module | Clean-sky radiation diagnostics | Notes                                                                   | CESM simulation cost<br>± standard error,<br>(processor hours /<br>model year) | Relative simulation<br>cost (% above MAM3<br>with clean-sky<br>diagnostics switched<br>OFF) |
|----------------|---------------------------------|-------------------------------------------------------------------------|--------------------------------------------------------------------------------|---------------------------------------------------------------------------------------------|
| MAM3           | OFF                             | Standard CAM5.3                                                         | 325.5±0.8                                                                      | 0.0%                                                                                        |
| MAM7           | OFF                             | Standard CAM5.3 + MAM7                                                  | 435.6±1.5                                                                      | +33.8%                                                                                      |
| MARC           | OFF                             | Clean-sky diagnostics switched off via<br>modification of source code   | 344.3±0.7                                                                      | +5.8%                                                                                       |
| MAM3           | ON                              | Diagnostic clean-sky radiation call specified in<br>simulation namelist | 362.3±0.8                                                                      | +11.3%                                                                                      |
| MAM7           | ON                              | Diagnostic clean-sky radiation call specified in<br>simulation namelist | 472.2±1.0                                                                      | +45.1%                                                                                      |
| MARC           | ON                              | Standard CAM5.3-MARC-ARG                                                | 361.1±0.7                                                                      | +10.9%                                                                                      |

Supplementary Figures

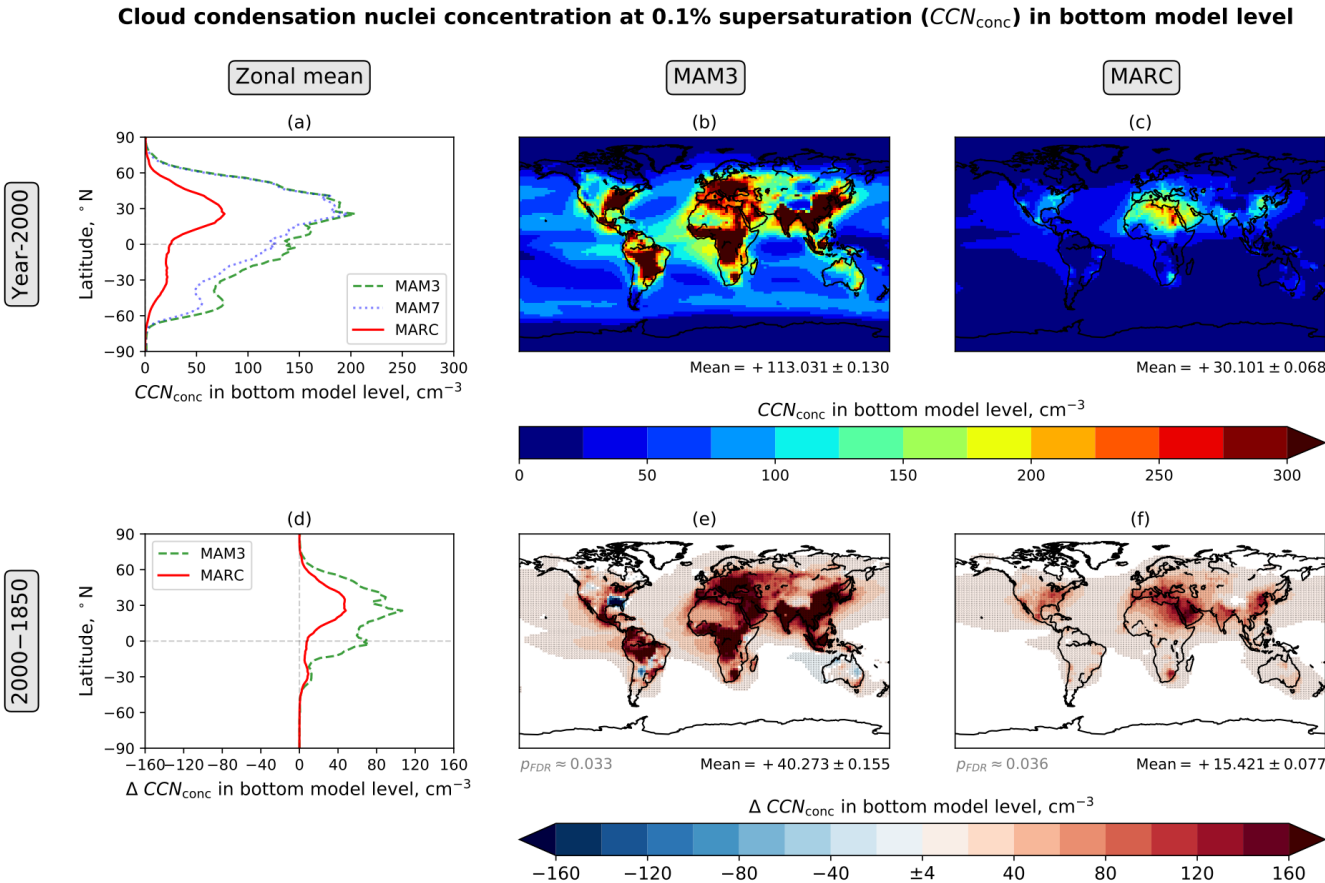

**Figure S1: Annual mean cloud condensation nuclei concentration at 0.1% supersaturation ( $CCN_{conc}$ ) in the bottom model level.**  
The figure components are explained in the caption of Fig. 1 in the main manuscript.

**Cloud condensation nuclei concentration at 0.1% supersaturation ( $CCN_{conc}$ ) in model level 19 (~525hPa)**

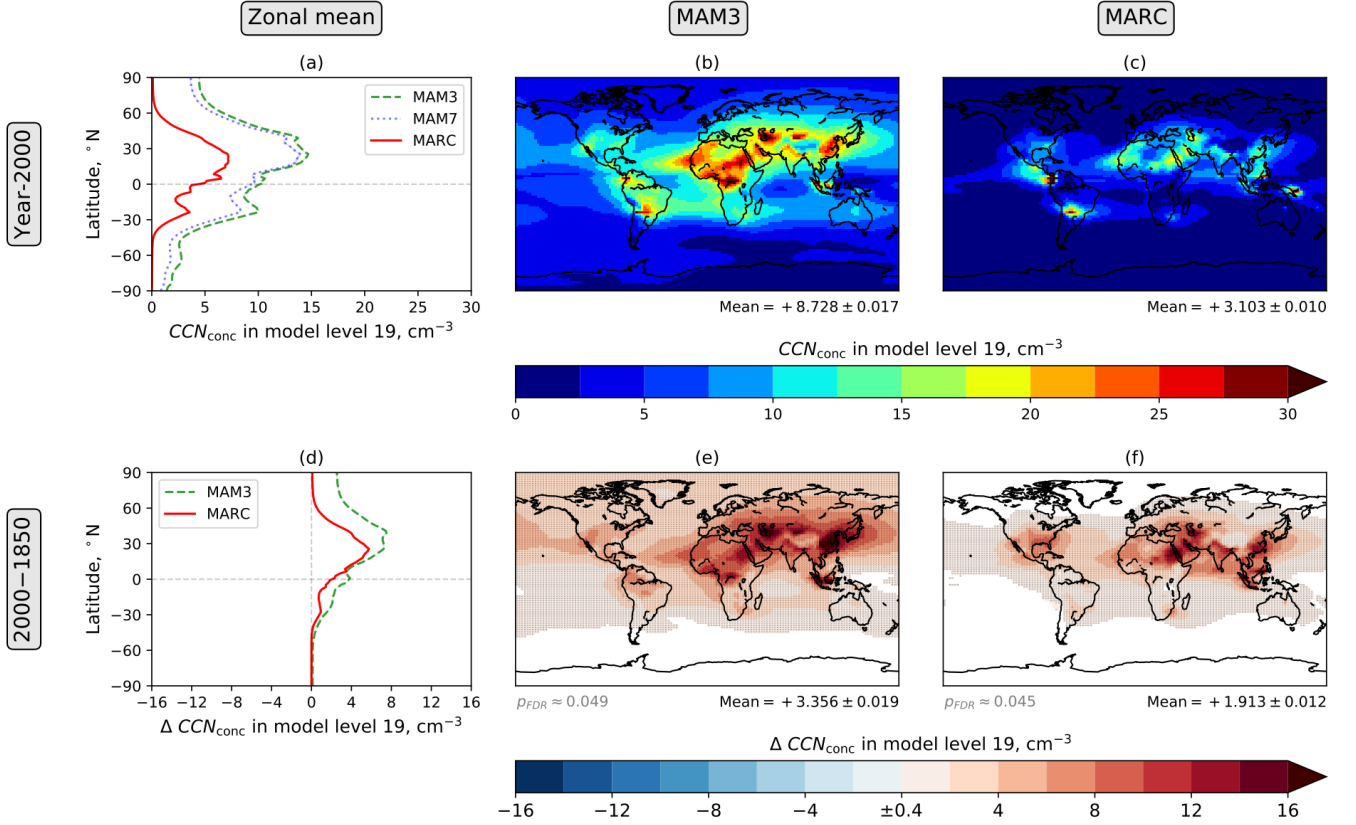

**Figure S2: Annual mean cloud condensation nuclei concentration at 0.1% supersaturation ( $CCN_{conc}$ ) in model level 19 (in the mid-troposphere). The figure components are explained in the caption of Fig. 1 in the main manuscript.**

# Grid-box total cloud (liquid + ice) water path ( $WP_{\text{total}}$ )

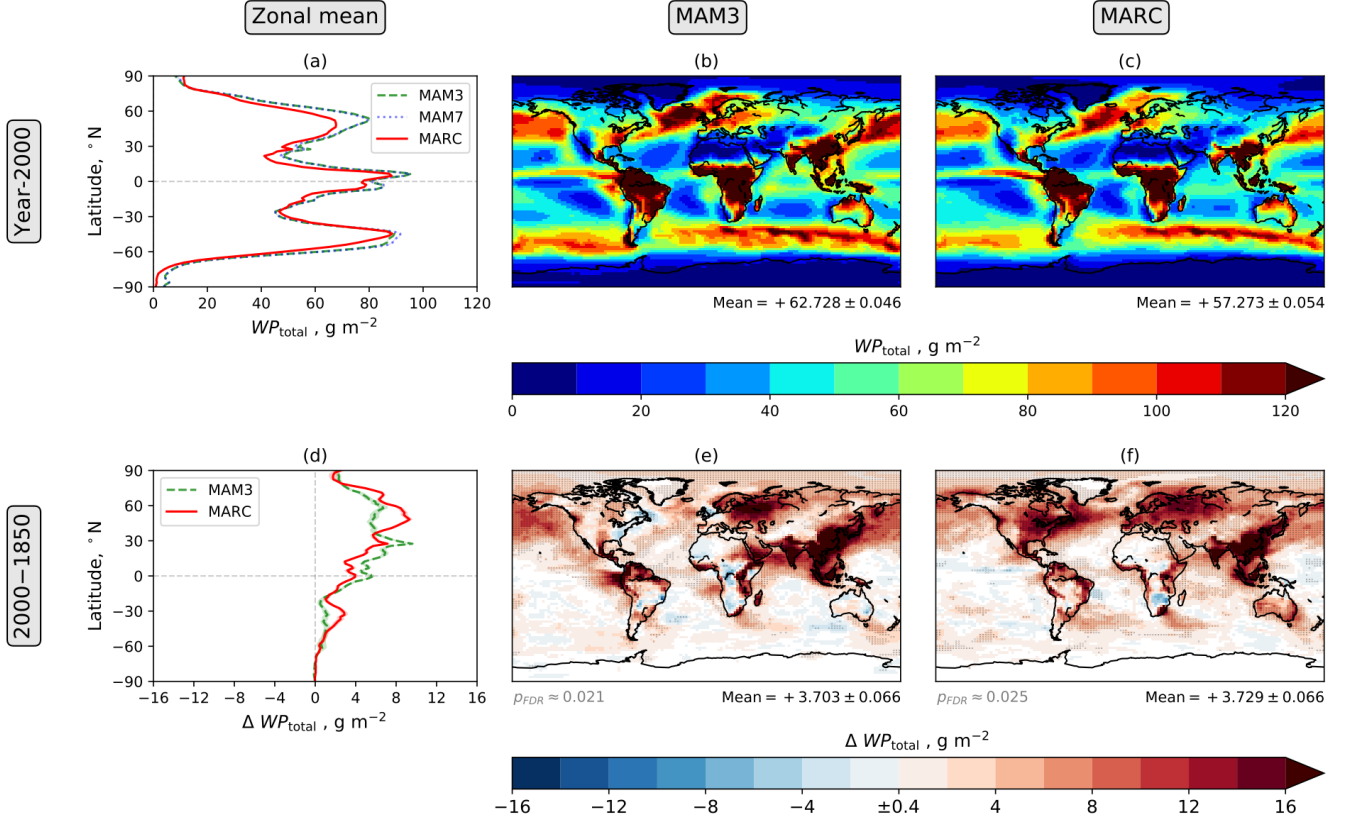

**Figure S3:** Annual mean grid-box total cloud water path ( $WP_{\text{total}} = WP_{\text{liquid}} + WP_{\text{ice}}$ ). The figure components are explained in the caption of Fig. 1 in the main manuscript.

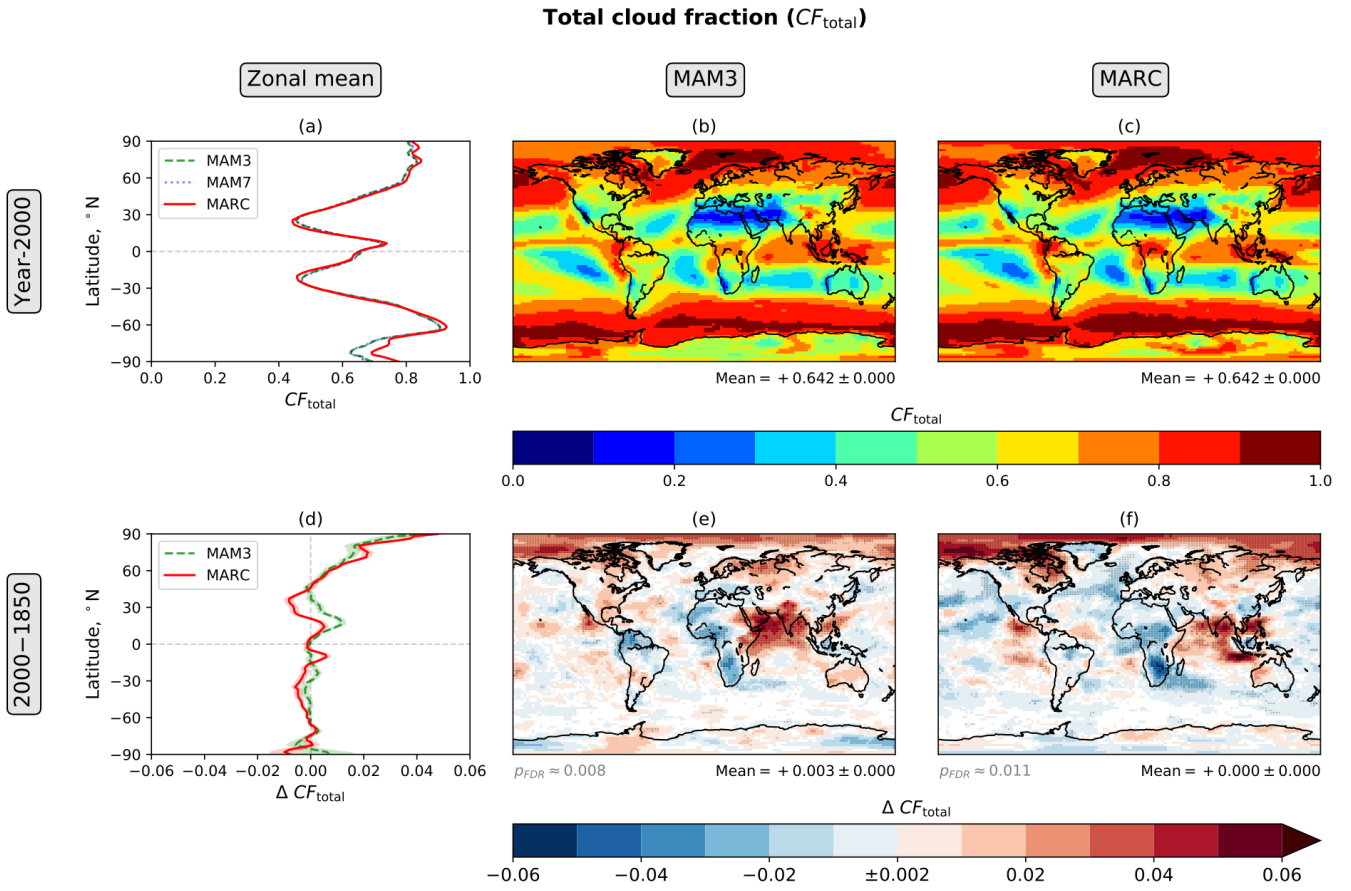

**Figure S4: Annual mean total cloud fraction ( $CF_{\text{total}}$ ).** The figure components are explained in the caption of Fig. 1 in the main manuscript.

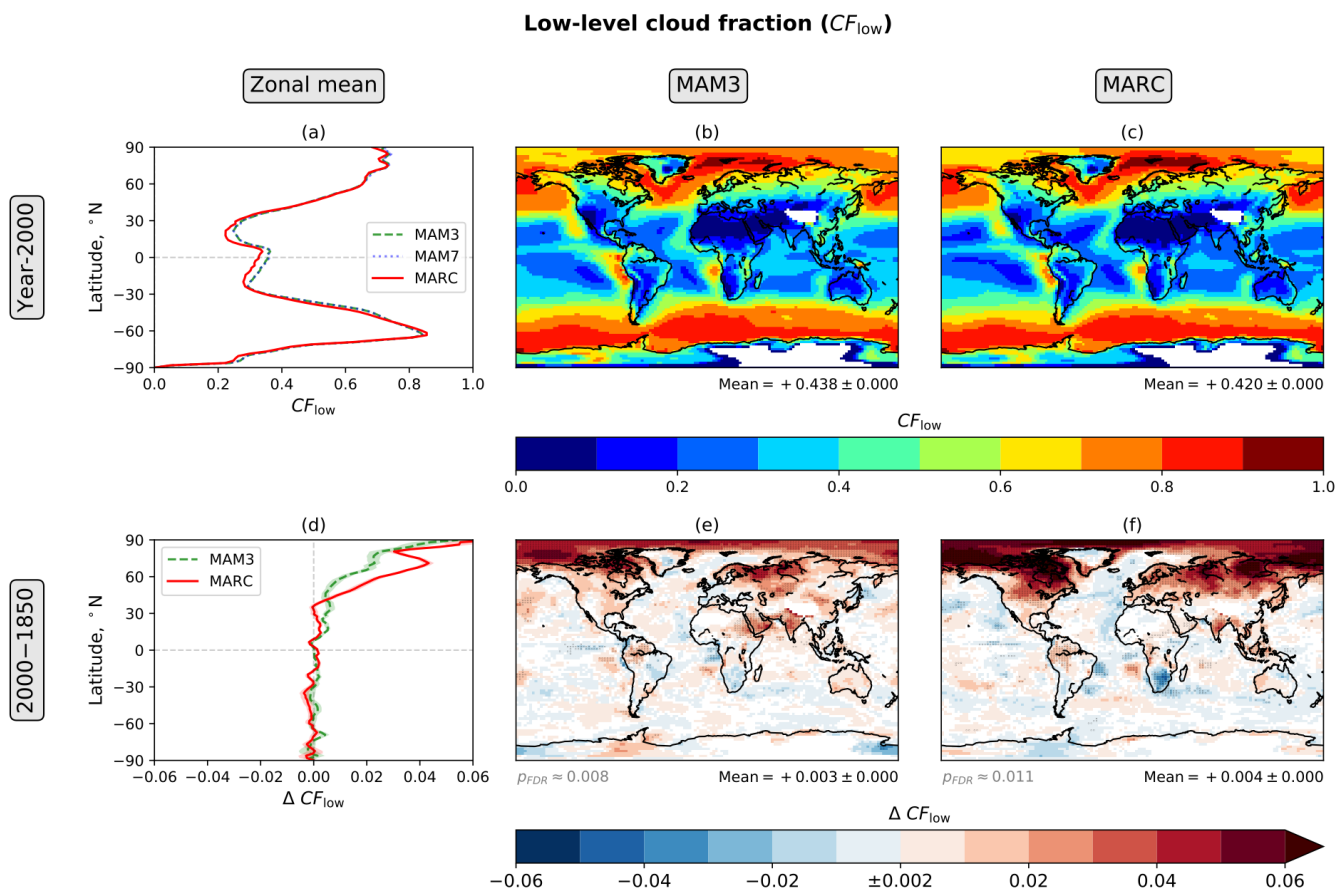

**Figure S5: Annual mean low-level cloud fraction ( $CF_{low}$ ).** The figure components are explained in the caption of Fig. 1 in the main manuscript.

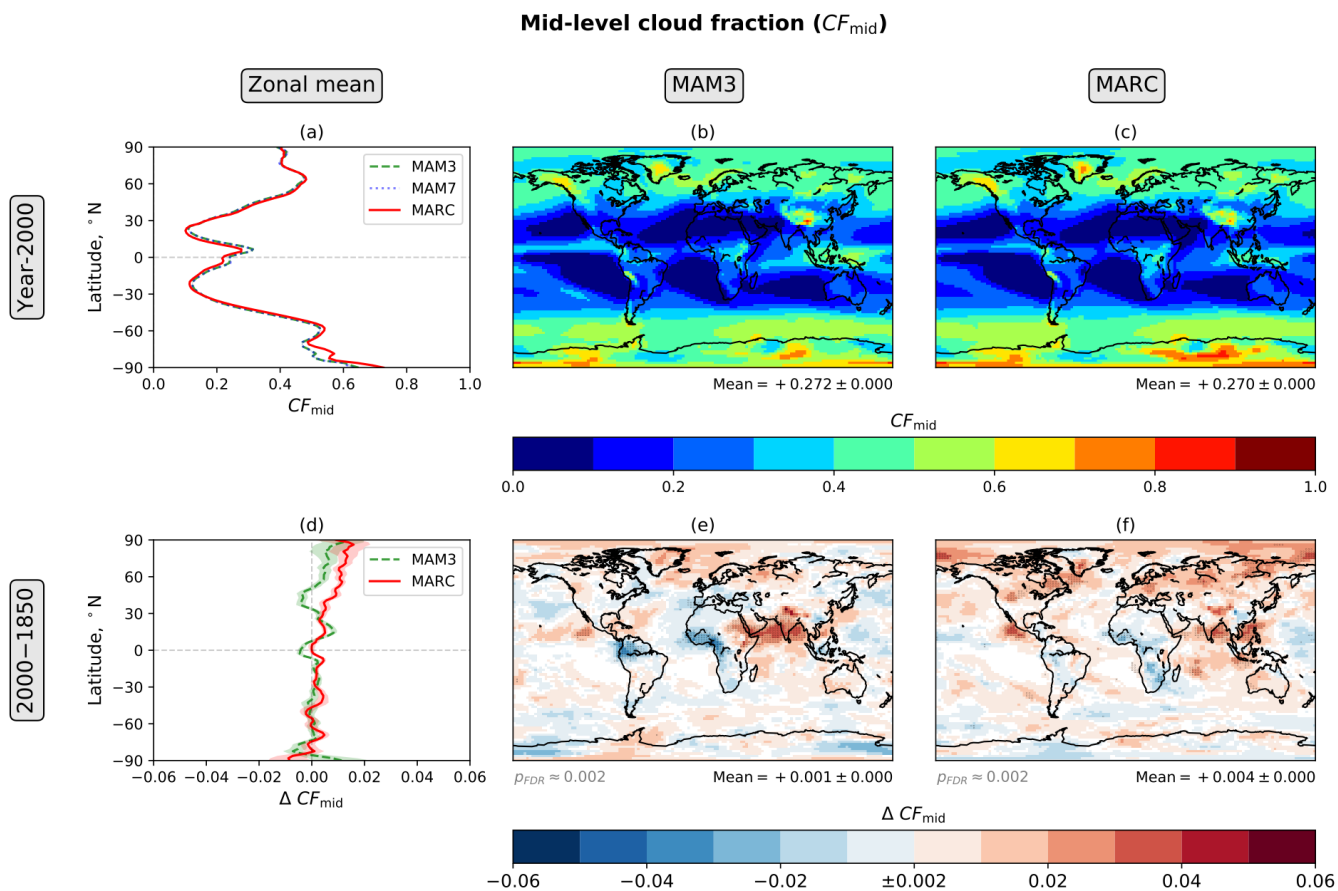

**Figure S6: Annual mean mid-level cloud fraction ( $CF_{\text{mid}}$ ).** The figure components are explained in the caption of Fig. 1 in the main manuscript.

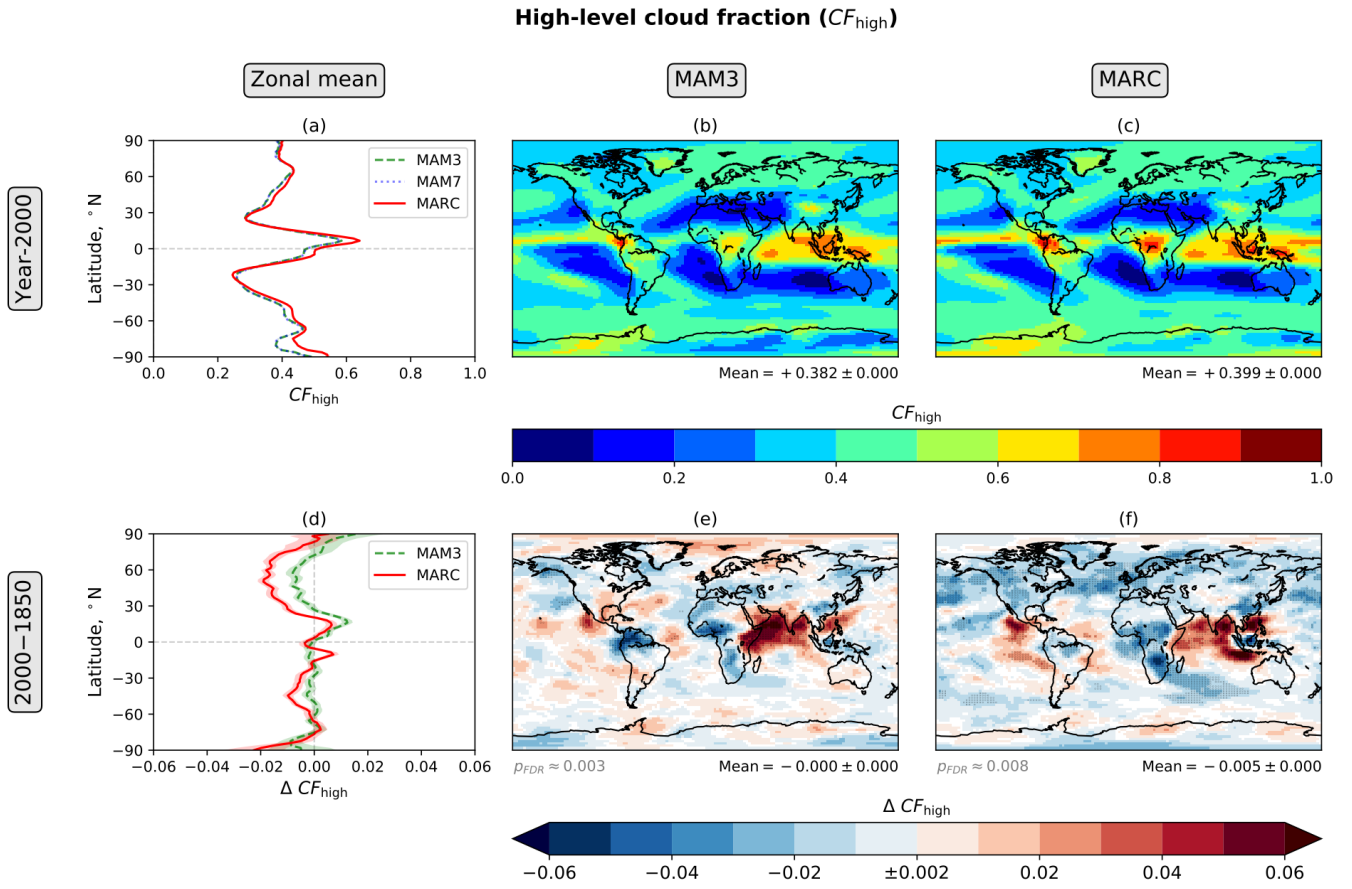

**Figure S7: Annual mean high-level cloud fraction ( $CF_{\text{high}}$ ).** The figure components are explained in the caption of Fig. 1 in the main manuscript.

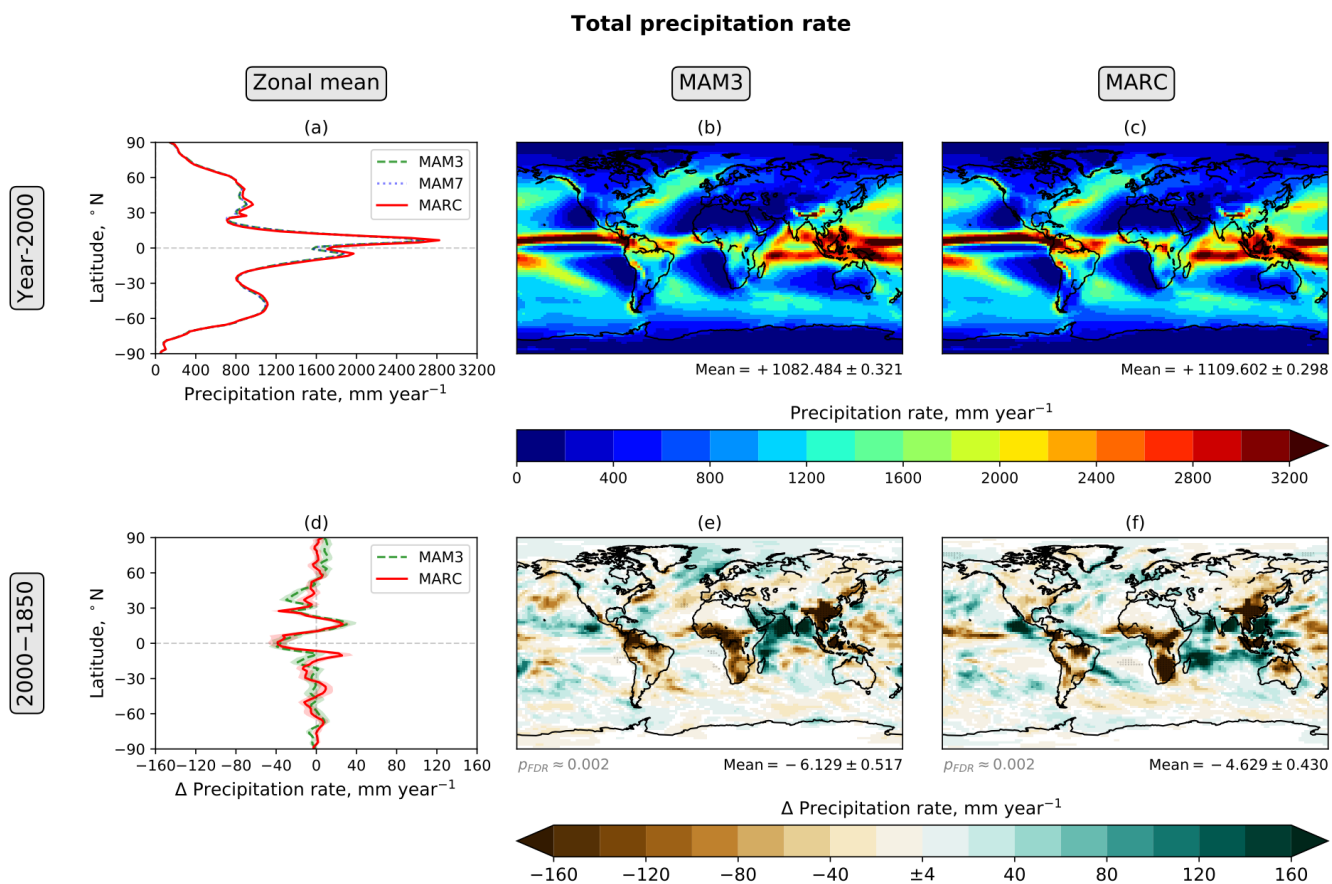

**Figure S8: Annual mean total precipitation rate.** The figure components are explained in the caption of Fig. 1 in the main manuscript.

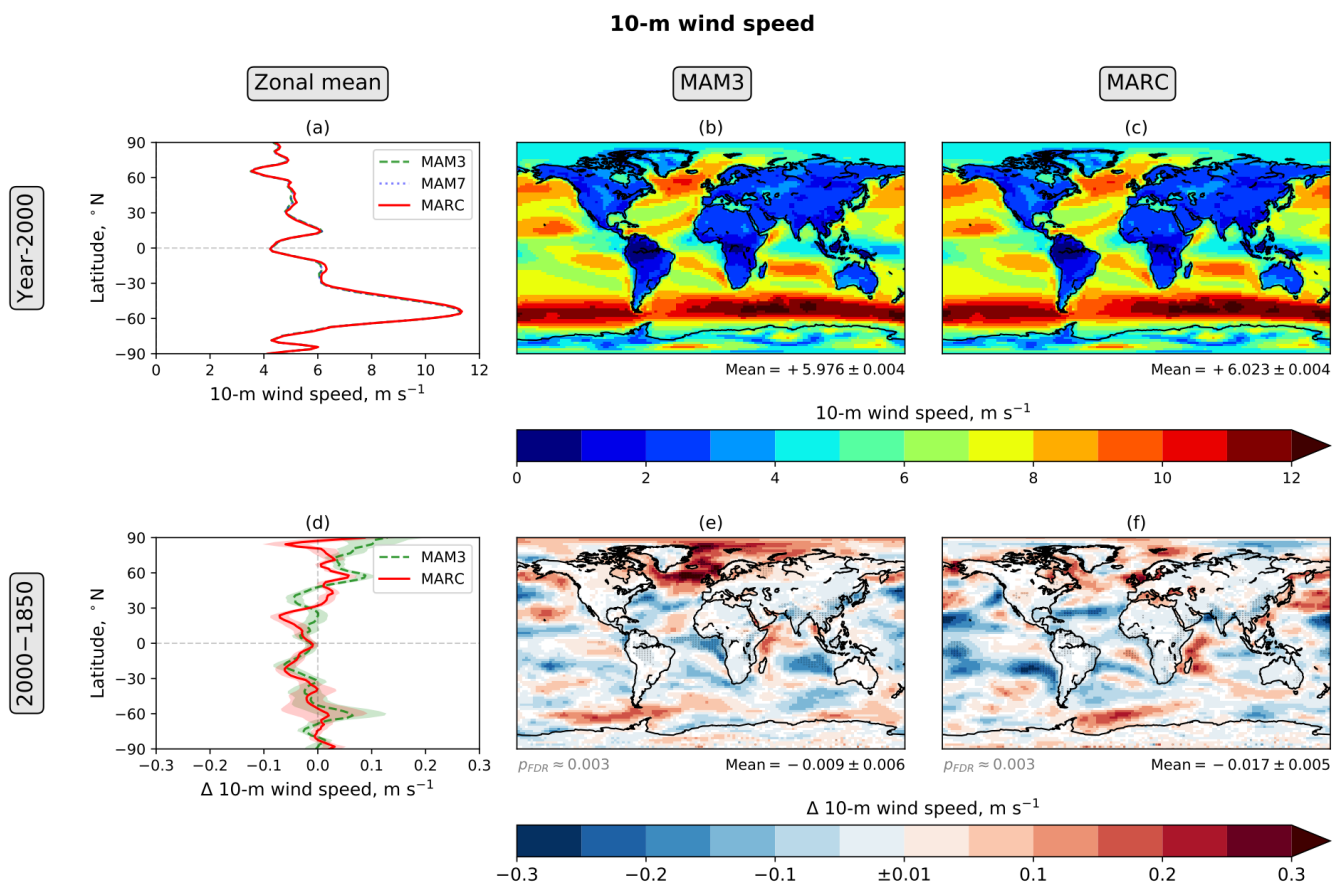

**Figure S9: Annual mean 10-m wind speed.** The figure components are explained in the caption of Fig. 1 in the main manuscript.

# Fraction of surface covered by snow

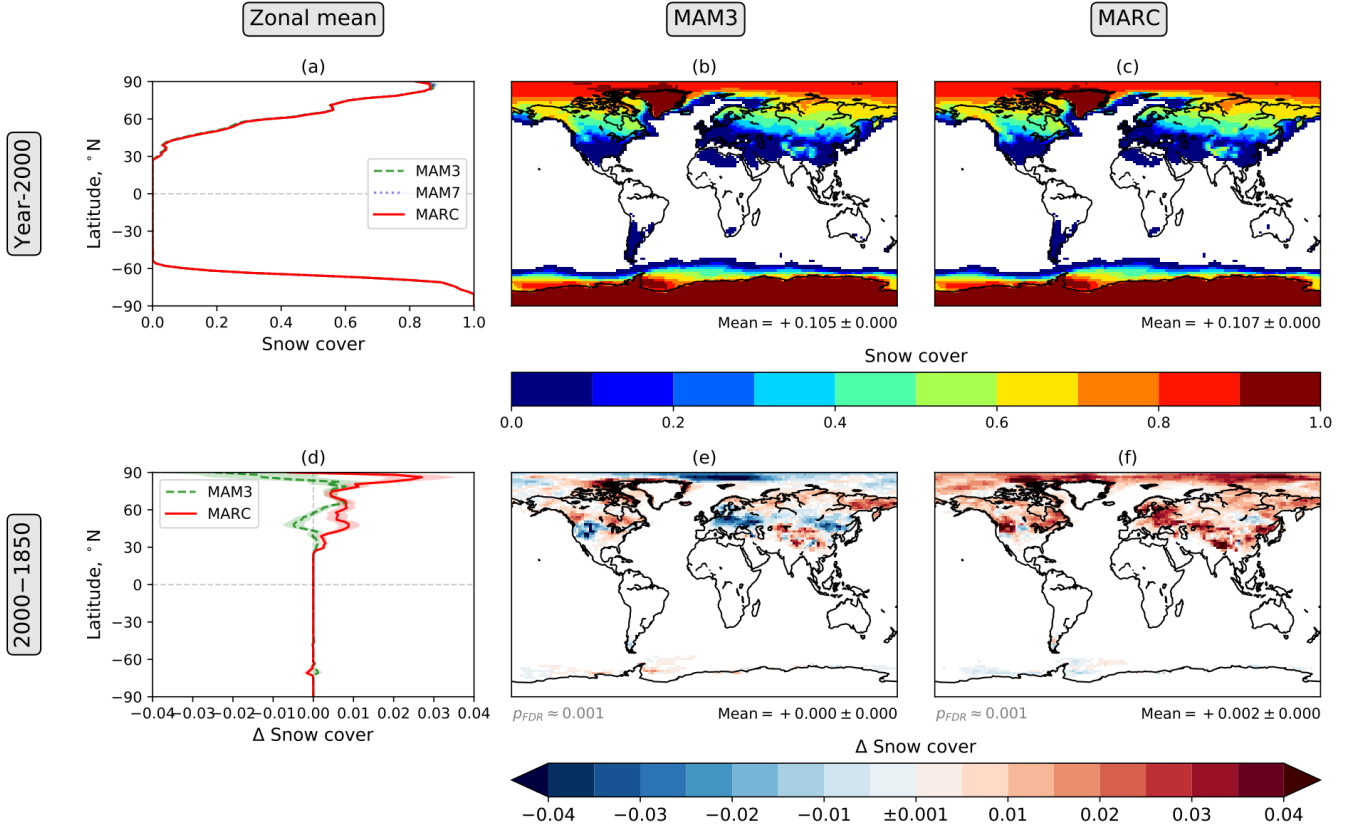

**Figure S10: Annual mean fraction of the earth's surface covered by snow.** The figure components are explained in the caption of Fig. 1 in the main manuscript.

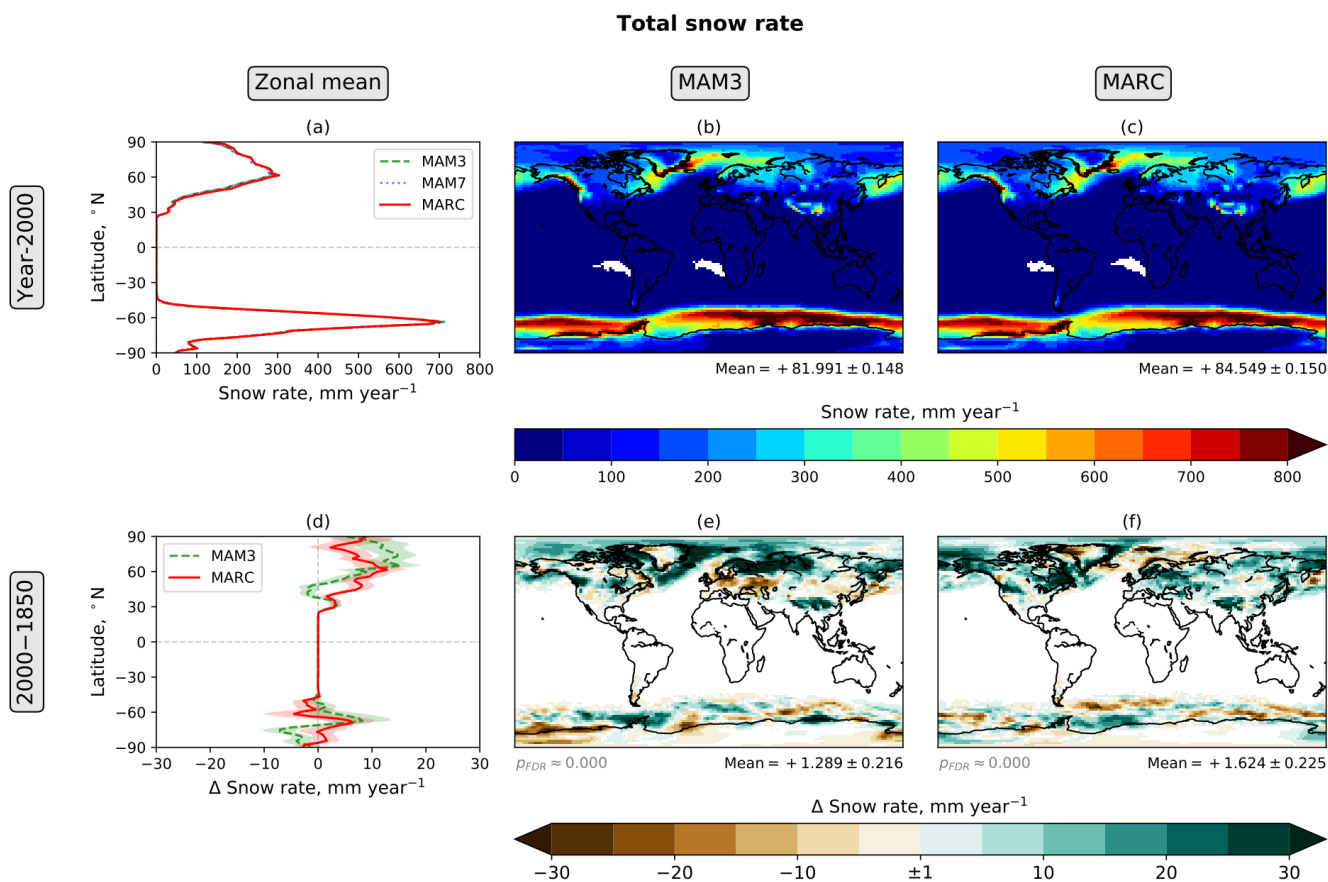

**Figure S11: Annual mean total snow rate.** The figure components are explained in the caption of Fig. 1 in the main manuscript.

# **Total black carbon (BC) deposition (dry + wet) over land**

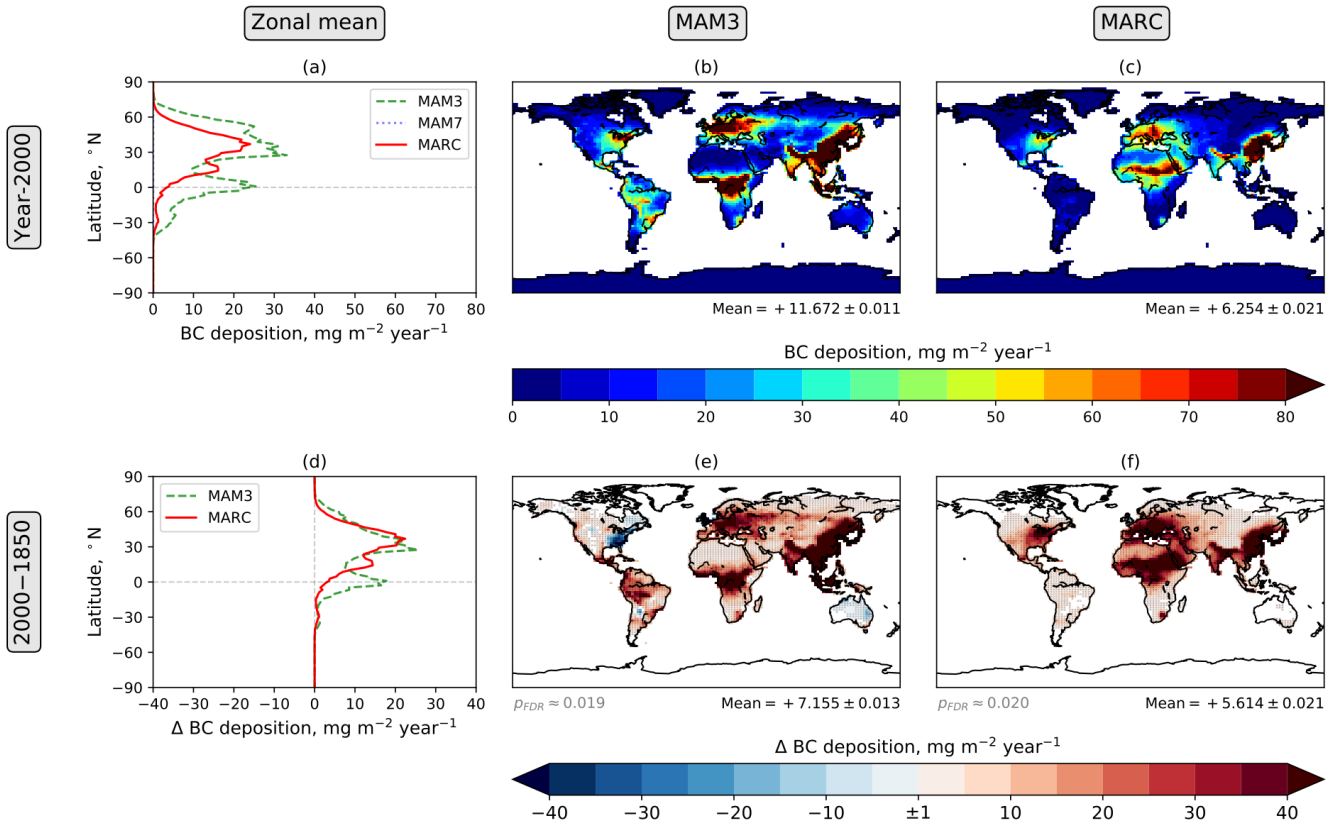

**Figure S12: Annual mean total black carbon deposition over land.** The figure components are explained in the caption of Fig. 1 in the main manuscript.

## Mass of black carbon (BC) in top layer of snow over land

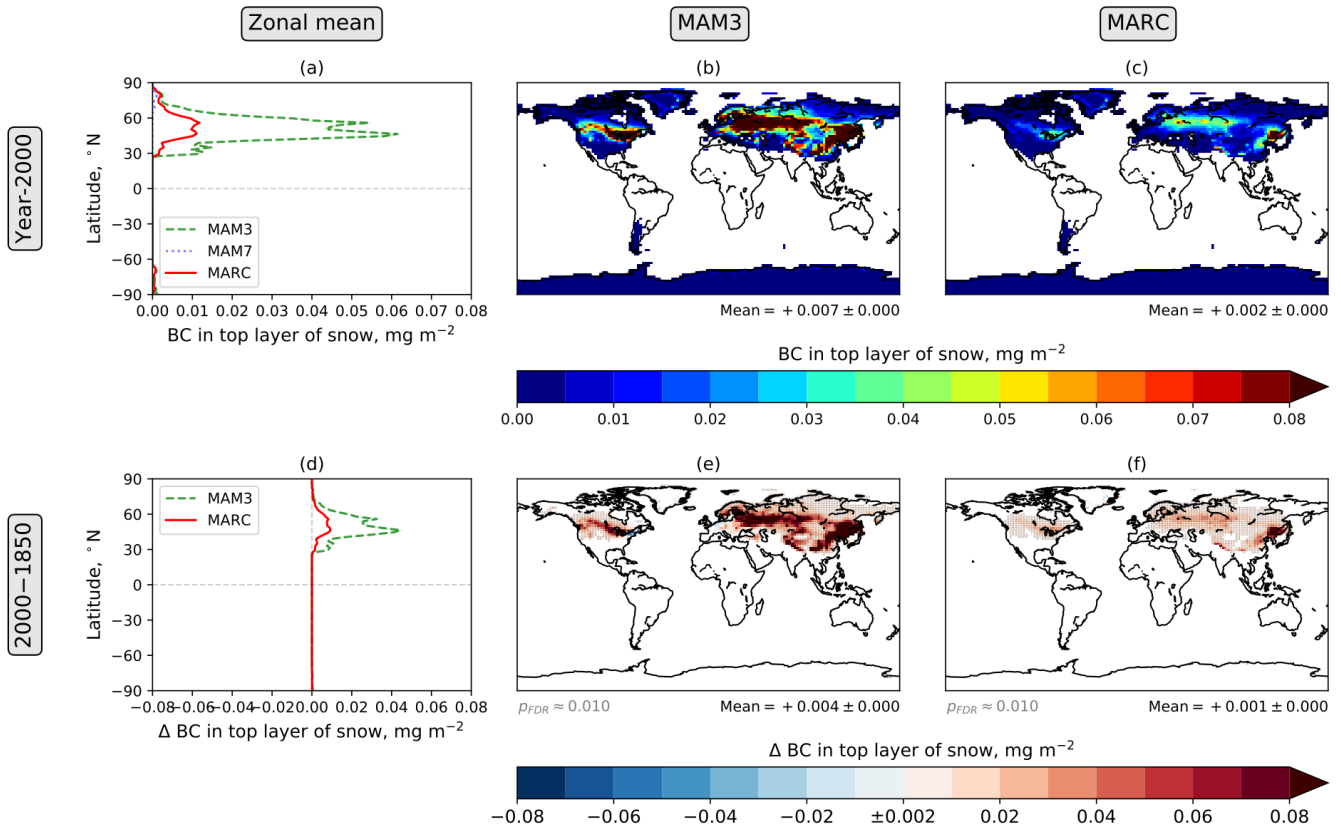

**Figure S13: Annual mean mass of black carbon in the the top layer over snow over land. The figure components are explained in the caption of Fig. 1 in the main manuscript.**

5

## References

CESM Software Engineering Group: CESM User's Guide (CESM1.2 Release Series User's Guide), [online] Available from: <http://www.cesm.ucar.edu/models/cesm1.2/cesm/doc/usersguide/ug.pdf> [accessed 2017-10-31], 2015.
